# Supplementary material for: Design and Construction of a New Plasma Applicator for the Improved Disinfection and Activation of Large Surfaces
Source: MDPI journal article supplement (doi:10.3390/plasma5040032), 2022-10-21
Supplement: s1 [file s1]

Archive with 1 entries (1 files):
- plasma-1942829-supplementary.pdf
